# Supplementary material for: Array-based sequencing of filaggrin gene for comprehensive detection of disease-associated variants
Source: PubMed Central journal article supplement (PMC5792052; doi:10.1016/j.jaci.2017.10.001), 2018-02

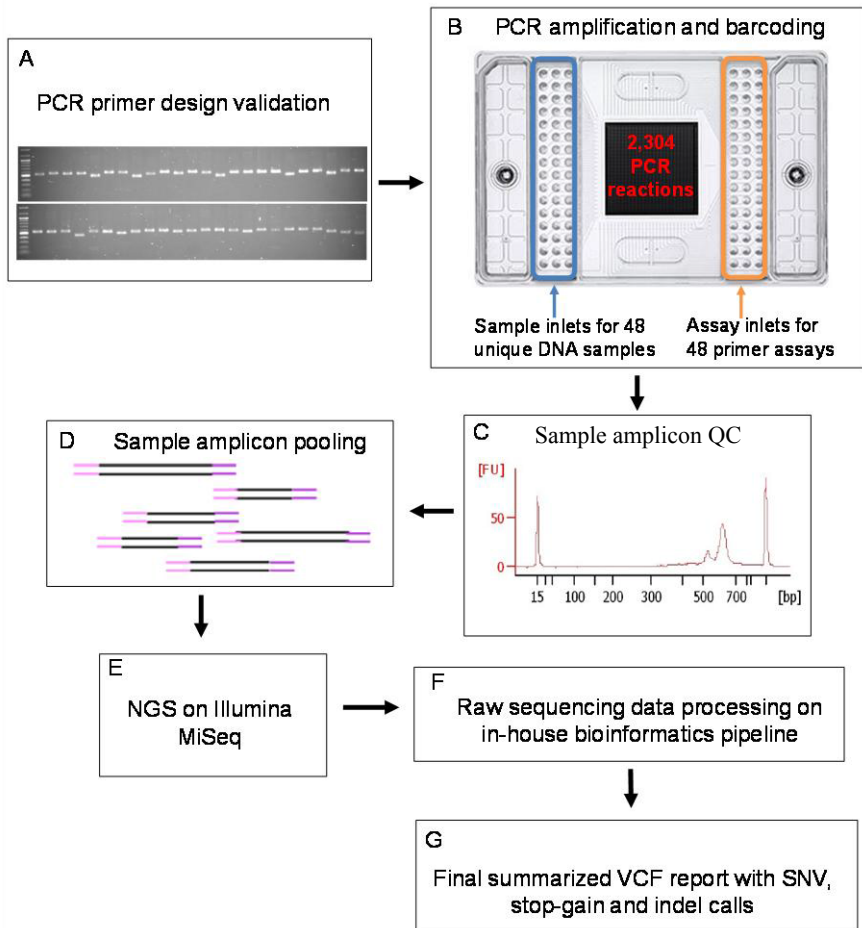

Supplement: mmc11.pdf [file mmc11.pdf]
