# Supplementary material for: Array-based sequencing of filaggrin gene for comprehensive detection of disease-associated variants
Source: PubMed Central journal article supplement (PMC5792052; doi:10.1016/j.jaci.2017.10.001), 2018-02

A

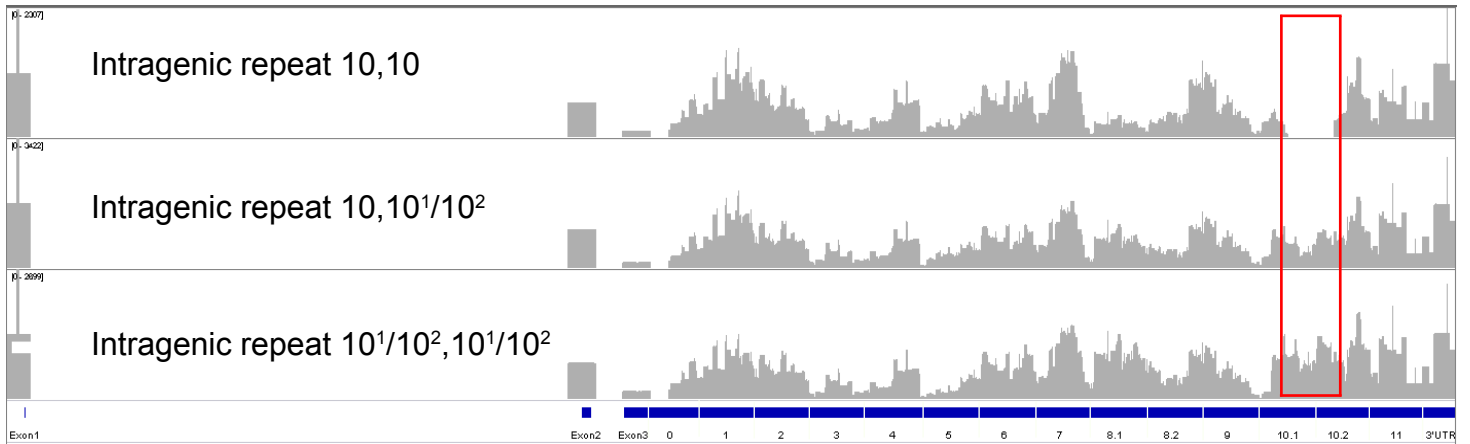

B

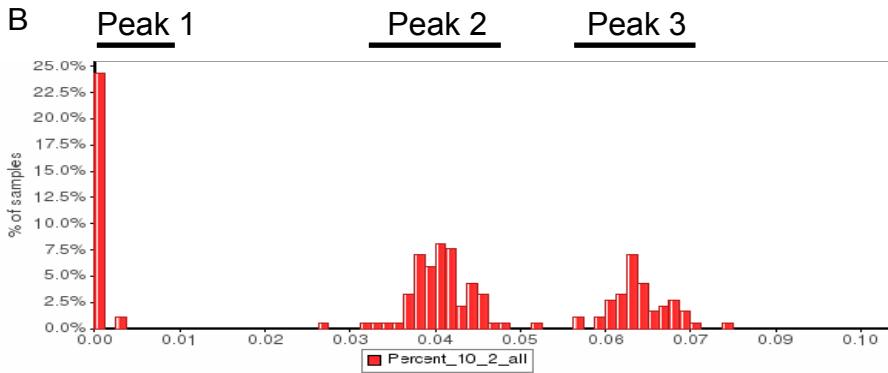

C

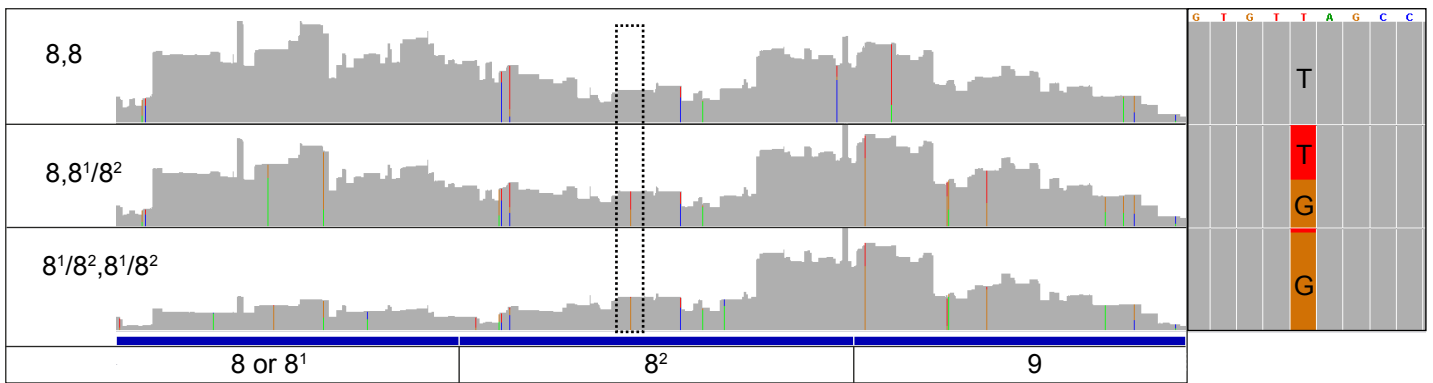

D

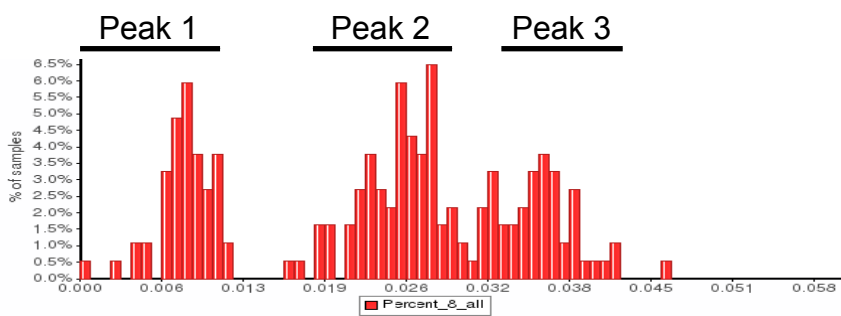

Supplement: mmc12.pdf [file mmc12.pdf]
